# Supplementary material
Source: ML conference proceedings conference paper supplement (https://openaccess.thecvf.com/content/CVPR2024/html/Lee_Grid_Diffusion_Models_CVPR_2024_paper.html)
Supplement: Supplementary file 2 [file Lee_Grid_Diffusion_Models_CVPR_2024_supplemental.zip › cgcaption.txt]

A majestic dragon flying over a medieval castle.
A group of children playing soccer in the rain.
A curious squirrel exploring a bustling city.
A grandmother knitting a scarf under a cherry blossom tree.
A group of aliens playing jazz music on Mars.
An elegant ballerina dancing on a moonlit stage.
A majestic whale jumping out of the ocean at sunset.
A pair of hummingbirds weaving a nest together.
A robot cooking breakfast in a futuristic kitchen.
A group of cats having a birthday party.
A mermaid reading a book in an underwater library.
A knight jousting with a dragon in a crowded arena.
A painter creating a masterpiece in a sunflower field.
An astronaut playing golf on the moon.
A group of penguins sliding down a snowy hill.
A panda eating bamboo in a lush green forest.
A scarecrow coming to life in a cornfield.
A group of dinosaurs having a picnic in a meadow.
A wizard brewing a potion in a hidden cave.
A group of birds migrating south for the winter.
A ninja fighting off enemies on top of a moving train.
A koala sleeping in a eucalyptus tree.
A group of monks meditating on a mountaintop.
A magical unicorn galloping through a sparkling forest.
A group of children building a snowman.
A mermaid and a sailor having a dance-off.
A ghost exploring a haunted house.
A family of beavers building a dam.
A superhero saving a city from a giant monster.
A group of musicians performing in a subway station.
A pair of flamingos doing a mating dance.
A chef preparing a feast in a bustling kitchen.
A fairy flying around a blooming garden.
A group of firefighters putting out a forest fire.
A photographer capturing a perfect sunrise.
A group of ants carrying food back to their colony.
A detective solving a mystery in a noir city.
A giraffe and a chameleon playing hide-and-seek.
A group of robots playing soccer in a futuristic stadium.
A cowboy and an alien having a showdown in a desert.
A group of scientists discovering a new species in a tropical rainforest.
A young boy flying his first kite in a windy field.
A group of pirates looking for treasure on a deserted island.
A gentle giant walking a tiny dog in a city park.
A group of owls hunting at night in a dense forest.
A school of colorful fish swimming in a coral reef.
A group of children playing tag in a sunny park.
A family of elephants crossing a river at sunset.
A group of skaters performing tricks in a city plaza.
A team of dogs pulling a sled in the Arctic.
A group of friends camping under a star-filled sky.
A young girl exploring a magical forest filled with fairies.
A group of zebras running across the savannah.
A vampire and a werewolf having a chess match.
A group of rabbits digging a network of tunnels.
A band of rockstars performing at a sold-out concert.
A group of explorers finding a hidden city in the jungle.
A time traveler visiting ancient Egypt.
A group of mice stealing cheese from a kitchen.
A butterfly emerging from its cocoon in a lush garden.
A group of astronauts fixing
A pirate ship sailing under a full moon.
A group of kangaroos hopping across the Australian Outback.
A young wizard casting a spell in an enchanted forest.
A team of archaeologists uncovering an ancient tomb.
A group of corgis running in a field of tulips.
A beautiful peacock spreading its feathers in a royal garden.
A group of raccoons sneaking around a campsite.
A ballerina and a hip hop dancer in a dance-off.
A group of turtles sunbathing on a sandy beach.
A child chasing a rainbow after a spring shower.
A family of dolphins playing in the waves.
A woodpecker building a home in an old oak tree.
A group of butterflies fluttering around a botanical garden.
A detective and his dog solving a missing toy case.
A group of frogs croaking on lily pads in a pond.
A couple dancing tango on a bustling city street.
A group of fireflies illuminating a dark forest.
A horse galloping freely across a wide prairie.
A group of seals lounging on an iceberg.
A mad scientist conducting an experiment in his lab.
A group of ladybugs climbing up a daisy.
A snowboarder carving down a steep mountain slope.
A group of chefs competing in a cook-off.
A mother duck leading her ducklings across a busy street.
A group of kids building a treehouse in their backyard.
An alchemist concocting a potion in a hidden laboratory.
A group of bats flying out of a cave at dusk.
A couple ice-skating on a frozen lake under the northern lights.
A group of puppies playing in a pile of autumn leaves.
A trio of adventurers exploring a mysterious cave.
A group of birds singing on a bright spring morning.
A werewolf howling under a full moon in a dense forest.
A group of monkeys swinging from tree to tree in a jungle.
A baker preparing fresh bread in a rustic bakery.
A group of snowmen having a snowball fight.
A diver swimming alongside a great white shark.
A group of dogs participating in a dog show.
A samurai practicing his sword skills on a misty morning.
A group of starfish sunbathing on a rocky beach.
A student studying for finals in a university library.
A busy morning in a traditional farmers market.
A chef preparing sushi in a high-end restaurant.
A group of cyclists competing in a city race.
A lifeguard watching over a crowded beach on a hot summer day.
A team of doctors performing a critical surgery.
An artist painting a cityscape from a rooftop.
A group of children learning to swim in a public pool.
A basketball game happening in a neighborhood court.
A scientist studying samples in a high-tech laboratory.
A family setting up a tent on a camping trip.
A group of friends hiking in a national park.
A busy day in a Wall Street trading floor.
A journalist covering a breaking news story.
A group of teenagers at their first rock concert.
A gardener tending to a rose garden.
A group of people waiting for a bus in the rain.
A conductor leading an orchestra in a grand concert hall.
A group of commuters in a bustling subway station.
A wedding planner organizing a beach wedding.
A group of workers constructing a skyscraper.
A teacher leading a class in a small country school.
A group of children playing hide-and-seek in a park.
A baker making fresh pastries in a small bakery.
A group of volunteers cleaning up a city park.
A marathon runner crossing the finish line.
A group of friends playing a board game on a rainy day.
A gardener planting flowers in a backyard.
A group of people practicing Tai Chi in a park.
A street musician playing a violin in a city center.
A group of children learning to dance in a studio.
A mechanic fixing a car in a garage.
A group of people doing yoga on a beach at sunrise.
A farmer feeding animals in a barn.
A group of friends making a snowman.
A photographer capturing the beauty of a waterfall.
A group of surfers catching waves at dawn.
A hairdresser cutting a client's hair in a salon.
A group of workers in a coffee roasting factory.
A barista preparing coffee in a busy café.
A group of bird watchers in a national park.
A fisherman casting a net on a sunny morning.
A group of tourists exploring a historic castle.
A window cleaner working on a tall skyscraper.
A group of children playing catch in a backyard.
A couple walking their dog in a city park.
A group of hikers reaching a mountain peak.
A musician tuning a guitar before a performance.
A group of people ice skating in a winter park.
A sculptor creating a statue from a block of marble.
A group of friends having a barbecue on a sunny day.
A florist arranging flowers in a shop.
A group of people dancing at a music festival.
A street artist painting a mural on a city wall.
A group of students on a field trip to a museum.
A couple cooking together in a modern kitchen.
A group of friends playing soccer in a local park.
A writer working on a novel in a quiet library.
A group of children running a lemonade stand.
A family decorating their house for Christmas.
A group of people participating in a city marathon.
A pilot preparing for takeoff in a cockpit.
A group of friends on a road trip in a vintage van.
A young girl learning to ride a bike in her neighborhood.
A group of photographers capturing wildlife in a nature reserve.
A barista creating latte art in a trendy coffee shop.
A group of friends building a sandcastle on the beach.
A local band performing at a small music festival.
A group of volunteers planting trees in a community park.
A yoga instructor leading a class in an outdoor setting.
A group of people celebrating New Year's Eve in Times Square.
A winemaker inspecting grapes in a vineyard.
A group of skateboarders practicing tricks at a skate park.
A couple setting up their new home together.
A group of people participating in a charity walkathon.
A businessman reading a newspaper on the morning commute.
A group of children enjoying a puppet show in a park.
A woman walking her dog in the city at sunrise.
A group of tourists taking a boat tour on a river.
A firefighter training with his team at the fire station.
A group of students studying together in a library.
A man proposing to his girlfriend in a romantic setting.
A group of people practicing Capoeira on a beach.
A woman jogging in a city park early in the morning.
A group of friends enjoying a bonfire on a winter night.
A man teaching his son to fish on a peaceful lake.
A group of chefs preparing for a cooking competition.
A family enjoying a picnic in a forest.
A group of people watching a movie in an outdoor cinema.
A girl learning to play the piano in a music class.
A group of fans cheering at a baseball game.
A man reading a book in a quiet coffee shop.
A group of friends playing frisbee in a park.
A woman shopping for fresh vegetables at a local market.
A group of friends stargazing on a clear summer night.
A man and his son flying a kite on a windy day.
A group of friends making homemade pizza in a kitchen.
A woman watering plants in her home garden.
A group of people dancing at a wedding reception.
A group of squirrels having a picnic in a park.
A butterfly dancing around blooming flowers.
A robot learning to play the piano.
A unicorn galloping across a rainbow bridge.
A group of penguins having a snowball fight.
A mermaid sunbathing on a rock in the middle of the ocean.
A dragon flying over a medieval castle.
A group of fairies throwing a party in a mushroom circle.
A panda practicing martial arts in a bamboo forest.
A dinosaur playing baseball with a group of kids.
An octopus painting a masterpiece under the sea.
A group of aliens having a barbecue on the moon.
A family of rabbits preparing for Easter.
A gnome fishing in a small pond.
A turtle racing with a hare.
A group of ants building a sand castle.
A cat and dog having a dance-off.
A flamingo teaching ballet to a group of ducks.
A lion singing in a rock band at a jungle concert.
A group of owls having a spelling bee.
A koala climbing the Eiffel Tower.
A group of ghosts playing hide and seek in a haunted house.
A kangaroo delivering mail in the outback.
A bear cooking honey cupcakes in his forest kitchen.
A group of mice going on a cheese tasting tour.
A chameleon changing colors while dancing on a disco floor.
A hedgehog knitting a sweater with its quills.
A group of bees playing soccer with a pollen ball.
A crocodile brushing its teeth after dinner.
A raccoon playing the banjo at a forest concert.
A group of elephants painting murals with their trunks.
A zebra trying on different colored stripes.
A monkey conducting a symphony orchestra in a jungle.
A group of seagulls having a flying competition.
A dolphin surfing on a wave in the sea.
A cactus enjoying a rainy day in the desert.
A group of meerkats having a lookout competition.
A snowman sunbathing on a beach.
A hummingbird participating in a flower nectar drinking contest.
A group of bats having a singing competition in a cave.
A squirrel doing a tightrope walk between trees.
A whale teaching a fish school in the ocean.
A group of spiders having a web weaving contest.
A unicorn sliding down a rainbow.
A group of fireflies illuminating a forest during a concert.
A polar bear playing volleyball with snowballs.
A caterpillar practicing yoga on a leaf.
A wolf howling a lullaby to the moon.
A group of foxes having a tail beauty contest.
A peacock hosting a fashion show in the jungle.
A man sculpting a sand replica of the Eiffel Tower at a beach.
A group of children painting a mural on a school wall.
A street magician performing an illusion for a captivated crowd.
A group of friends participating in a city-wide scavenger hunt.
A woman practicing her tightrope walking skills in a city park.
A group of people participating in a spontaneous flash mob.
A graffiti artist creating a masterpiece on an abandoned building.
A group of friends racing homemade soapbox cars.
A man playing a tune on wine glasses filled with different water levels.
A group of people participating in a hot air balloon race.
A chef making a towering croquembouche in a professional kitchen.
A group of teenagers hosting a robot-building competition.
A woman creating intricate designs with sidewalk chalk.
A group of friends having a DIY kite flying competition.
A man making a canoe by hand in his backyard.
A group of friends building a domino setup throughout their house.
A woman training her parrot to perform tricks.
A group of people having a silent disco party in a park.
A man setting up a large-scale model train set.
A group of friends participating in a homebrewing beer competition.
A woman designing a dress from recycled materials.
A group of people having a pumpkin carving contest.
A man practicing fire-breathing in a safe, open space.
A group of friends creating a stop-motion animation film.
A woman making an elaborate sandcastle on the beach.
A group of people participating in a community mural painting.
A man building an intricate birdhouse for his garden.
A group of friends trying to break a world record.
A woman weaving a large tapestry on a loom.
A group of people creating a living statue performance.
A man building a treehouse for his children.
A group of friends setting up a pop-up restaurant in their home.
A woman crafting an intricate paper mache mask.
A group of people performing a puppet show in a park.
A man creating a portrait using only typewriter art.
A group of friends participating in a homemade boat race.
A woman decorating her home with handmade macrame wall hangings.
A group of people trying to construct the tallest house of cards.
A man making a large-scale sculpture from recycled metal.
A group of friends creating a community garden.
A woman setting up an elaborate Rube Goldberg machine.
A group of people attempting to create the longest human chain.
A man creating detailed topiary in his garden.
A group of friends having a themed costume party.
A woman growing a vegetable garden on her apartment balcony.
A group of people making lanterns for a local festival.
A man composing a song on handmade instruments.
A group of friends hosting a backyard film festival.
A woman crafting homemade candles.
A group of people participating in a community bike ride.
A snail racing against a turtle in a garden obstacle course.
